# Supplementary material
Source: ML conference proceedings conference paper supplement (https://proceedings.mlr.press/v108/dasgupta20a.html)
Supplement: Supplementary file [file dasgupta20a-supp.pdf]

## Robust Learning from Discriminative Feature Feedback

Sanjoy Dasgupta and Sivan Sabato

## A Deferred Proofs

*Proof of Theorem 1.* For (a), we first observe that we may assume without loss of generality that the components in  $\mathcal{G}$  are pairwise disjoint: iteratively, for any two components  $G_0, G_1$  that are not pairwise disjoint, replace them with  $G'_0, G'_1$  such that, for  $i \in \{0, 1\}$ ,

$$G'_i := (G_i \setminus G_{1-i}) \cup \{x \in G_0 \cap G_1 \mid G(x) = G_i\}.$$

The result is a representation with the same number of components as  $\mathcal{G}$  that are pairwise disjoint, and all the responses of the teacher in the interaction protocol remain the same.

Let  $c^*$  be a concept that agrees with  $\bar{c}$  on all but the  $k$  exceptions, such that  $|M(c^*, \mathcal{G})| = 0$ . We prove the upper bound by induction on  $k$ . Suppose that for some value of  $k$ , for any concept  $c'$  such that  $|M(c', \mathcal{G})| = k$ , there is a representation  $\mathcal{G}'$  of size  $m' \leq m + dk$  that satisfies  $|M(c', \mathcal{G}')| = 0$ . This trivially holds for  $k = 0$ .

Now, consider a concept  $\bar{c}$  such that  $|M(\bar{c}, \mathcal{G})| = k + 1$ . Let  $c'$  be a concept which agrees with  $c^*$  on all but  $k$  elements, and agrees with  $\bar{c}$  on all but one element. Let  $\mathcal{G}' = \{G'_1, \dots, G'_{m'}\}$  be the representation assumed by the induction hypothesis for  $c'$ , and let  $x$  be the single element such that  $\bar{c}(x) \neq c'(x)$ . We construct a representation  $\bar{\mathcal{G}}$  for  $\bar{c}$ .

Under the disjointness assumption, there is a single component which includes  $x$ . Suppose it is  $G'_1$ . For each  $j \in [d]$ , define the components  $\bar{G}(j)$  as follows. Define  $P_j^x := \{z \in \mathcal{X} \mid \phi_j(z) \neq \phi_j(x)\}$ . Let  $\bar{G}(j) := G'_1 \cap P_j^x$ . Define an additional singleton component  $\bar{G}_x = \{x\}$ . Note that  $\{\bar{G}(j)\}_{j \in [d]} \cup \{\bar{G}_x\}$  exactly covers  $G'_1$ . Define

$$\bar{\mathcal{G}} := \{\bar{G}(j)\}_{j \in [d]} \cup \{G'_2, \dots, G'_{m'}\} \cup \{\bar{G}_x\}.$$

For any  $\bar{G} \subseteq G'_1$  such that  $\bar{G} \neq \bar{G}_x$ , set  $\ell(\bar{G}) := \ell(G'_1)$ . In addition, set  $\ell(\bar{G}_x) := \bar{c}(x)$ .  $\bar{\mathcal{G}}$  is a legal representation, with  $|M(\bar{\mathcal{G}}, \bar{c})| = 0$ . The legality of  $\bar{\mathcal{G}}$  can be observed by noting that the union of  $\bar{\mathcal{G}}$  is  $\mathcal{X}$ , that the labels of all components agree with  $\bar{c}$ , and that any two components in  $\bar{\mathcal{G}}$  with a different label can be separated by a single feature: If  $\bar{G}_1 \subseteq G'_i$  and  $\bar{G}_2 \subseteq G'_j$  for  $i \neq j$  and their labels disagree, then the same feature that separates  $G'_i$  and  $G'_j$  separates  $\bar{G}_1$  and  $\bar{G}_2$ . If  $\bar{G}_1, \bar{G}_2 \subseteq G'_1$  and  $\ell(\bar{G}_1) \neq \ell(\bar{G}_2)$ , then necessarily one of the components is  $\bar{G}_x$  and the other is  $\bar{G}(j)$  for some  $j$ . In this case, the feature  $j$  separates the two components. The size of  $\bar{\mathcal{G}}$  is  $m' + d \leq m + d(k + 1)$ ,

as required by the upper bound. Note that while  $\bar{\mathcal{G}}$  is not pairwise disjoint, it can be converted to a pairwise-disjoint representation by the process described above. This completes the proof of the upper bound.

To prove the lower bound (b), it suffices to consider the following example, defined over  $\mathcal{X} = \{0, 1\}^d$ , where  $\phi_j(x)$  is the value of coordinate  $j$  in  $x$ . Let  $\mathcal{G} = \{\mathcal{X}\}$ ,  $\ell(\mathcal{X}) = 0$ . Let  $\bar{c}$  be a concept that agrees with  $c^* \equiv 0$ , except on  $z_0 = (0, \dots, 0)$ . Let  $\mathcal{G}'$  be a representation that has  $|M(\bar{c}, \mathcal{G}')| = 0$ . We claim that  $|\mathcal{G}'| \geq d + 1$ . Consider the vectors  $e_1, \dots, e_d$ . Suppose that some  $G \in \mathcal{G}'$  has  $e_i, e_j \in G$  for  $i \neq j$ . Then no single feature can separate  $G$  from the component that includes  $z_0$ . Therefore, there are at least  $d$  components for each of  $e_i$ , and a separate one for  $z_0$ . This gives a lower bound of  $d + 1$ .  $\square$

*Proof of Theorem 2.* Let  $P_m$  be the set of pairs  $(i, j)$  such that  $i, j \in [m]$  and  $i < j$ . Define a set of features  $\Phi := \{\phi_{i,j}^p \mid i, j \in [m], i \neq j, p \in \{0, 1\}\}$ . Define a family of  $2^{|P_m|}$  possible representations  $\{\mathcal{G}_S\}_{S \subseteq P_m}$ . The representation  $\mathcal{G}_S$  includes  $m$  components  $G_1, \dots, G_m$ , such that for  $i < j$ , component  $G_i$  is separated from component  $G_j$  using the feature  $\phi_{i,j}^{S_{i,j}}$ , where  $S_{i,j} := \mathbb{I}[(i, j) \in S]$ . In other words, for each pair of components, one of two possible features  $\phi_{i,j}^0, \phi_{i,j}^1$  separates them. We further define that in  $G_i$  the separating feature is positive, while it is negative in  $G_j$ . For simplicity, we denote  $\phi_{j,i} := \neg \phi_{i,j}$ . Formally,  $G_i$  in representation  $\mathcal{G}_S$  is the set of examples which satisfy  $\left(\bigwedge_{j:i < j} \phi_{i,j}^{S_{i,j}}\right) \wedge \left(\bigwedge_{j:i > j} \neg \phi_{i,j}^{S_{i,j}}\right)$ . In all the representations, the label of the examples in  $G_i$  is set to  $i$ .<sup>1</sup>

Define an example  $x_{i,j}$  for  $(i, j) \in P_m$  as follows: For all  $l \neq i, j$  and  $z \in \{0, 1\}$ , all the features  $\phi_{i,l}^z$  and  $\phi_{j,l}^z$  get the value that excludes them from  $G_l$ . The feature  $\phi_{i,j}^0$  is set to positive, and  $\phi_{i,j}^1$  is set to negative. Thus, in all representations  $S$ ,  $x_{i,j} \in G_i \cup G_j$ , and  $x_{i,j} \in G_i$  if and only if  $(i, j) \in S$ . Now, consider a stream of examples that presents  $x_{i,j}$  for  $(i, j) \in P_m$  in a uniformly random order and labels them using a representation  $\mathcal{G}_S$  selected uniformly at random over  $S \subseteq P_m$ , so that the label of  $x_{i,j}$  is  $i$  if  $(i, j) \in S$  and  $j$  otherwise.

The stream of examples is the same for all representa-

<sup>1</sup>A similar example with only two labels can be shown, at the cost of a smaller multiplicative factor in the mistake bound.

tions. Thus, the only information on  $S$  can be obtained from the discriminative features. There are  $\binom{m}{2}$  possible elements in  $S$ , and each discriminative feature feedback in this problem reveals whether  $(i, j) \in S$  for a single pair  $(i, j)$ . Moreover, if this is unknown for some pair  $(i, j)$  when  $x_{i,j}$  is revealed, then both values of  $S_{i,j}$  are equally likely conditioned on the run so far. In this case, any algorithm will provide the wrong label with a probability at least a half. Now, after less than  $|P_m|/2$  mistakes, there is a probability of at least a half to observe such an example in the next iteration. Therefore, in the first  $|P_m|/2$  examples of the stream, there is a probability of at least  $1/4$  that the algorithm makes a mistake on the next example. Thus, the expected number of mistakes is at least  $|P_m|/8 = \Omega(m^2)$ .  $\square$

To prove Lemma 13, we use the following concentration inequality.

**Lemma 15.** *Let  $\delta \in (0, 1/e^2)$ , let  $k$  be an integer and let  $p \in [\frac{1}{2}, 1)$ . The probability that a sum of  $k$  independent geometric random variables with probability of success  $p$  is larger than  $\frac{1}{p} \min(2k \log(1/\delta), (k + 4\sqrt{k} \log^{3/2}(1/\delta)))$  is at most  $\delta$ .*

*Proof.* This lemma follows from Hoeffding's inequality, by noting that the number of successes in  $N$  experiments with success probability  $p$  is distributed as  $\text{Binom}(N, p)$ , and having

$$\mathbb{P}[\text{Binom}(N, p) < k] \leq \exp(-2N(p - k/N)^2).$$

First, defining  $N_1 := 2k \log(1/\delta)/p$ , we have

$$k/N_1 = p/(2 \log(1/\delta)) \leq p(1 - 1/\sqrt{2}).$$

Hence,  $p - k/N_1 \geq p/\sqrt{2}$ . It follows that

$$\begin{aligned} \exp(-2N_1(p - k/N_1)^2) &\leq \exp(-N_1 p^2) \\ &\leq \exp(-N_1 p/2) = \exp(-k \log(1/\delta)) \leq \delta. \end{aligned}$$

Second, suppose that  $k \geq 4 \log(1/\delta)$ , and let  $\alpha := \sqrt{\log(1/\delta)}/4k \leq \frac{1}{4}$ . Defining

$$N_2 := 2(1 + 4\alpha)k/p = \frac{1}{p}(2k + 4\sqrt{k \log(1/\delta)}),$$

we have that

$$1/(p - \alpha) = 1/p + \alpha/(p(p - \alpha)) \leq (1 + 4\alpha)/p,$$

where the last inequality follows since  $p \geq \frac{1}{2}$  and  $\alpha \leq \frac{1}{4}$ . Therefore,  $N_2 \geq k/(p - \alpha)$ , hence  $k/N_2 \leq p - \alpha$ , hence

$$\begin{aligned} \exp(-2N_2(p - k/N_2)^2) &\leq \exp(-4(k/p)\alpha^2) \\ &= \exp(-\log(1/\delta)/p) \leq \delta. \end{aligned}$$

The proof is completed by observing that the first bound in the statement of the lemma is  $N_1$ , and the second bound is always larger than  $N_2$ , and for  $k \leq 4 \log(1/\delta)$ , it is larger than  $N_1$ .  $\square$

We now prove Lemma 13.

*Proof of Lemma 13.* Denote by  $L_t$  the set of rules  $L$  at the end of round  $t$  of the run of **StRoDFF**. Let

$$\mathcal{L}_t = \{x \in \mathcal{X} \mid \exists C \in L_t \text{ such that } x \text{ satisfies } C\},$$

and denote  $p_t := \mathbb{P}[X \in \mathcal{L}_t]$ , where  $X$  is a random example drawn according to the distribution creating the input stream. We now prove the main claim: that with a high probability, a rule is not created by **StRoDFF** at round  $t$  unless  $p_{t-1} \leq 1 - 2\epsilon$ . The claim is proved by induction on the sequence of rules created by **StRoDFF**. For the basis of the induction, observe that  $p_0 = 0$ , since  $L_0$  is empty. Therefore, the first rule created by **StRoDFF** certainly satisfies the claim for any  $\epsilon < \frac{1}{2}$ . For the induction step, suppose that the claim holds for the first  $l$  rules created by **StRoDFF**. Let  $t_0$  be the round in which the  $l$ 'th rule was created, and condition on the stream prefix ending in  $t_0$ . We show that the next rule also satisfies the claim.

First, for any round  $t \geq t_0$  until a new rule is created,  $p_t$  is monotonic non-increasing. This is because the possible transformations, other than creating a new rule, are to restrict a rule or to delete a rule, both of which can never increase the set of examples covered by  $L$ . Therefore, if  $p_{t_0} \leq 1 - 2\epsilon$ , then regardless of the round  $t$  in which the next rule is created, it satisfies  $p_{t-1} \leq 1 - 2\epsilon$ . Thus, assume below that  $p_{t_0} > 1 - 2\epsilon \geq \frac{1}{2}$ .  $p_{t_0}$  is the probability that a random example observed immediately after round  $t_0$  is satisfied by some rule in  $\mathcal{L}_{t_0}$ . Now, consider the first round after  $t_0$  that an example in  $\mathcal{L}_{t_0}$  arrives. Denote this round  $t_1$ . The value  $T_1 := t_1 - t_0$  is a geometric random variable with a success probability  $p_{t_0}$ . By Lemma 15 with  $k := 1$ ,  $p := p_{t_0}$ , with a probability at least  $1 - \delta/(8t_0^2)$ ,

$$T_1 \leq \frac{1}{p_{t_0}}(1 + 4 \log^{3/2}(8t_0^2/\delta)) < \gamma(\epsilon, 1, t_0).$$

In the last inequality we used  $p_0 > 1 - 2\epsilon$  and the definition of  $\gamma$ . Assume below that this event holds.

Now, consider  $N_{l,r}$ , which counts in **StRoDFF** the number of examples since the creation of the last rule, for which the default prediction  $(x_0, y_0)$  was provided. These are the examples that were not satisfied by any rule in  $L$  when they appeared. We prove by induction on the rounds that a new rule is not created at least until round  $t_1$ . If a new rule was not created until round  $t \in \{t_0 + 1, \dots, t_1 - 1\}$ , then  $L_t = L_{t_0}$  (since the set of rules does not change until  $t_1$  when an example falls in

$\mathcal{L}_{t_0}$ ). In addition,  $N_{lr} = t - t_0$ , since the examples until round  $t_1$  are not in  $\mathcal{L}_t = \mathcal{L}_{t_0}$ , thus they get the default prediction. Therefore,  $t - t_0 - N_{lr} = 0$ . It follows that in round  $t$ ,

$$N_{lr} \leq T_1 < \gamma(\epsilon, 1, t_0) \leq \gamma(\epsilon, t - t_{lr} - N_{lr} + 1, t).$$

This means that the condition in line 21 does not hold. Thus, under the event above, a new rule will not be created at round  $t$ . Since this holds by induction for all  $t \in \{t_0 + 1, \dots, t_1 - 1\}$ , it follows that if  $p_0 > 1 - 2\epsilon$  then a new rule is not created at least until the first example in  $\mathcal{L}_{t_0}$  arrives.

Now,  $\mathcal{L}_{t_1}$  is the set of rules after this example arrives, and the probability mass of examples in  $\mathcal{L}_{t_1}$  is  $p_{t_1}$ . More generally, let  $t_i$  be the first round after  $t_{i-1}$  in which an example in  $\mathcal{L}_{t_{i-1}}$  appears. If no new rule is created between  $t_0$  and  $t_i$ , then in round  $t_i$ , the set of rules changes from  $L_{t_{i-1}}$  to  $L_{t_i}$ . The number of rounds  $T_i := t_i - t_{i-1}$  between each two such examples is a geometric random variable with success probability  $p_{t_{i-1}}$ . Let  $r$  be the number of examples satisfied by  $L$  which appear in the stream until the next rule after  $t_0$  is created, and suppose for contradiction that  $p_{t_r} > 1 - 2\epsilon$ . For  $q \leq r$ , define the random variable  $S_q := \sum_{i=1}^q T_i$ . This is a sum of  $q$  independent geometric random variables, each with a probability of success larger than  $1 - 2\epsilon$  (since  $p_{t_q} \geq p_{t_r}$  for all  $q \leq r$ ). Thus,  $S_q$  is dominated by a sum of independent geometric random variables with a success probability of  $1 - 2\epsilon$ . Therefore, by Lemma 15, with a probability at least  $\delta / (8(t_0 + q - 1)^2)$ ,

$$\begin{aligned} S_r &\leq \frac{1}{1 - 2\epsilon} (q + 4\sqrt{q} \log^{3/2}(8(t_0 + q - 1)^2/\delta)) \\ &< \gamma(\epsilon, q, t_0 + q - 1) + q - 1. \end{aligned}$$

Assume below that this event holds for all  $q \leq r$ . We now prove that under the assumption on  $p_{t_r}$ , a new rule is not created until  $t_r$ , which is a contradiction. Suppose for induction that since round  $t_0$  until round  $t \leq t_r - 1$ , a new rule was not created. Let  $q \leq r$  such that  $t \in \{t_{q-1} + 1, \dots, t_q - 1\}$ . We have  $t_q = t_0 + S_q$ . Therefore, at round  $t$ ,  $N_{lr} = t - t_0 - (q - 1) < S_q - (q - 1)$ . It follows that under the assumed event, in round  $t$

$$N_{lr} < \gamma(\epsilon, q, t_0 + q - 1) \leq \gamma(\epsilon, t - t_{lr} - N_{lr} + 1, t).$$

Here, we used the fact that  $t_0 + q - 1 \leq t$ . It follows that the condition in line 21 does not hold in round  $t$ , thus a new rule is not created in this round. By induction, this holds for all  $t \leq t_r - 1$ , which contradicts the assumption that a rule was created until round  $t_r$ . Thus, if  $p_{t_r} > 1 - 2\epsilon$  then a new rule is not created at least until round  $t_r$ . Since this analysis holds for any value of  $r$ , we conclude that if all the events above hold simultaneously, then a new rule is never created in round  $t$  unless  $p_{t-1} \leq 1 - 2\epsilon$ . By a union bound on the

created rules and the sequence of examples between rule-creations, this is true with a probability at least  $1 - \delta/4$ .  $\square$

*Proof of Theorem 9.* First, we upper bound the number of mistakes on examples that are not satisfied by any rule when they are observed. Let  $t_1, t_2, \dots, t_R$ , which sum to  $n$ , be the lengths of times between creations of new rules (where  $t_1$  is time of the first rule and  $t_R$  is the time between the last rule and the end of the stream). We have by Lemma 14 that  $R \leq R(m, \delta) + 1$ . We have  $1/(1 - 2\epsilon) = 1 + 2\epsilon/(1 - 2\epsilon) \leq 1 + 4\epsilon$ , where the last inequality follows since  $\epsilon \leq \frac{1}{4}$ . Hence,

$$\begin{aligned} \gamma(\epsilon, r, t) &\equiv \frac{1}{1 - 2\epsilon} (r + 4\sqrt{r} \log^{3/2}(8t^2/\delta)) - r + 1 \\ &\leq 8\epsilon r + 8\sqrt{r} \log^{3/2}(8t^2/\delta). \end{aligned}$$

The number of mistakes resulting from examples not satisfied by any rule is upper-bounded by

$$\begin{aligned} \sum_{i=1}^R \gamma(\epsilon, t_i, n) &\leq 8\epsilon n + 8 \sum_{i=1}^R \sqrt{t_i} \log^{3/2}(8n^2/\delta) \\ &\leq 8\epsilon n + 8\sqrt{Rn} \log^{3/2}(8n^2/\delta). \end{aligned}$$

In addition, any existing rule may generate at most  $(m - 1)(q(\sigma, n) + 2) + q(\epsilon, n) + 1$  mistakes (since it would be deleted after that). Note that  $R = O(m \log(1/\delta))$ , and  $q(\epsilon, n) = O(\epsilon n + \log(n/\delta) + \sqrt{n \log(n/\delta)})$ . The total upper bound is thus  $O(\epsilon n + \sqrt{mn} \log^2(n/\delta) + m \log(1/\delta)(\epsilon n + m(\sigma n + \log(n/\delta) + \sqrt{n \log(n/\delta)}))$ . Dividing by  $n$  and reorganizing, we get the error rate in the statement of the lemma.  $\square$
